# Supplementary material for: Google Trends in Infodemiology and Infoveillance: Methodology Framework
Source: PubMed Central journal article supplement (PMC6660120; doi:10.2196/13439), 2019-05-29
Supplement: publichealth_v5i2e13439_app1.pdf [file publichealth_v5i2e13439_app1.pdf]

## Multimedia Appendix

**Table A1.** All levels of Available Categories and Subcategories of the “Health” Category

| 2nd level                           | 3rd level                              | 4th level                                                                                                |
|-------------------------------------|----------------------------------------|----------------------------------------------------------------------------------------------------------|
| Ageing & Geriatrics ⇨               | Alzheimer's Disease                    |                                                                                                          |
| Alternative & Natural Medicine ⇨    | Acupuncture & Chinese Medicine         |                                                                                                          |
|                                     | Cleansing & Detoxification             |                                                                                                          |
| Health Conditions ⇨                 | AIDS & HIV                             |                                                                                                          |
|                                     | Allergies                              |                                                                                                          |
|                                     | Arthritis                              |                                                                                                          |
|                                     | Cancer                                 |                                                                                                          |
|                                     | Cold & Flu                             |                                                                                                          |
|                                     | Diabetes                               |                                                                                                          |
|                                     | Ear, Noise & Throat                    |                                                                                                          |
|                                     | Eating Disorders                       |                                                                                                          |
|                                     | Endocrine Conditions ⇨                 | Diabetes<br>Thyroid Conditions                                                                           |
|                                     | Genetic Disorders                      |                                                                                                          |
|                                     | GERD & Digestive Disorders             |                                                                                                          |
|                                     | Heart and Hypertension                 |                                                                                                          |
|                                     | Infectious Diseases ⇨                  | Cold & Flu<br>Parasites & Parasitic Diseases<br>Sexually Transmitted Diseases<br>Vaccines & Immunization |
|                                     | Injury                                 |                                                                                                          |
|                                     | Neurological Disorders ⇨               | Alzheimer's Disease                                                                                      |
|                                     | Obesity                                |                                                                                                          |
|                                     | Pain Management ⇩                      | Headaches & Migraines                                                                                    |
|                                     | Respiratory Conditions ⇩               | Asthma                                                                                                   |
|                                     | Skin Conditions                        |                                                                                                          |
|                                     | Sleep Disorders                        |                                                                                                          |
| Health Education & Medical Training |                                        |                                                                                                          |
| Health Foundations & Med. Research  |                                        |                                                                                                          |
| Health News ⇩                       | Health Policy                          |                                                                                                          |
| Medical Devices & Equipment ⇩       | Assistive Technology                   |                                                                                                          |
| Medical Facilities & Services ⇩     | Doctor's Offices                       |                                                                                                          |
|                                     | Hospitals & Treatment Centers          |                                                                                                          |
|                                     | Medical Procedures                     |                                                                                                          |
|                                     | Physical Therapy                       |                                                                                                          |
| Medical Literature & Resources ⇩    | Medical Photos & Illustrations         |                                                                                                          |
| Men's Health ⇩                      | Erectile Dysfunction                   |                                                                                                          |
| Mental Health ⇩                     | Anxiety & Stress                       |                                                                                                          |
|                                     | Depression                             |                                                                                                          |
|                                     | Learning & Development Disabilities ⇩  | ADD & ADHD                                                                                               |
| Nursing ⇩                           | Assisted Living & Long Term Care       |                                                                                                          |
| Nutrition ⇩                         | Special & Restricted Diets ⇩           | Cholesterol Issues                                                                                       |
|                                     | Vitamins & Supplements                 |                                                                                                          |
| Oral & Dental Care                  |                                        |                                                                                                          |
| Pediatrics                          |                                        |                                                                                                          |
| Pharmacy ⇩                          | Drugs & Medications                    |                                                                                                          |
| Public Health ⇩                     | Health Policy                          |                                                                                                          |
|                                     | Occupational Health & Safety           |                                                                                                          |
|                                     | Poisons & Overdoses                    |                                                                                                          |
|                                     | Vaccines & Immunisations               |                                                                                                          |
| Reproductive Health ⇩               | Birth Control                          |                                                                                                          |
|                                     | Erectile Dysfunction                   |                                                                                                          |
|                                     | Infertility                            |                                                                                                          |
|                                     | OBGYN ⇩                                | Pregnancy & Maternity                                                                                    |
|                                     | Sex Education & Counseling             |                                                                                                          |
|                                     | Sexual Enhancement                     |                                                                                                          |
|                                     | Sexually Transmitted Diseases ⇩        | AIDS & HIV                                                                                               |
| Substance Abuse ⇩                   | Drug & Alcohol Testing                 |                                                                                                          |
|                                     | Drug & Alcohol Treatment               |                                                                                                          |
|                                     | Smoking & Smoking Cessation            |                                                                                                          |
|                                     | Steroids & Performance-Enhancing Drugs |                                                                                                          |
| Vision Care ⇩                       | Eye Glasses & Contacts                 |                                                                                                          |
| Women's Health ⇩                    | OBGYN ⇩                                | Pregnancy & Maternity                                                                                    |
